# Supplementary material for: Sympathetic-like-Integrated Engineered Heart Tissue Models AGEs-Induced Adverse Remodeling
Source: Research Square preprint supplement (doi:10.21203/rs.3.rs-7937768/v1), 2025-11-10
Supplement: Supplementary file 1 [file e327ac463cd3ab205f189ff5.docx]

# Supporting information for

# Sympathetic-like-Integrated Engineered Heart Tissue Models AGEs-Induced Adverse Remodeling

Yu-hong Wang a, 1, Xi-ming Zhu b, 1, Xiang Long a, c, 1, Shuo-ji Zhu a, c ,1, Ting-ting Liu d, Moussa Ide Nasser a, c, Zi-ming Liao b, Jia-cheng Shi b, Shu-ting Zhang a, Jia-lin Liao a, David T.W. Lui e, Ping Zhu a, c, *, Bin Yao b, *, Hai-xia Guan a, *

*a Department of Endocrinology, Guangdong Provincial People's Hospital (Guangdong Academy of Medical Sciences), Southern Medical University, Guangzhou 510100, China*

*b Academy of Medical Engineering and Translational Medicine, Tianjin University, 300072, China*

*c Guangdong Provincial Key Laboratory of Pathogenesis, Targeted Prevention and Treatment of Heart Disease, Guangzhou Key Laboratory of Cardiac Pathogenesis and Prevention, Guangdong 510100, China*

*d Department of Laboratory Diagnosis, The 971th Hospital, Qingdao 266000, China*

*e Division of Endocrinology and Metabolism, Department of Medicine, School of Clinical Medicine, Li Ka Shing Faculty of Medicine, The University of Hong Kong*

_______________________________________

1 Yuhong Wang, Ximing Zhu, Xiang Long and Shuoji Zhu contributed equally to this work.

_______________________________________

* Corresponding authors.

*E-mail addresses:* [hxguan@126.com](mailto:hxguan@126.com) (H. Guan),[hongyaobin_1212@tju.edu.cn](mailto:hongyaobin_1212@tju.edu.cn) (B. Yao), [tanganqier@163.com](mailto:tanganqier@163.com) (P. Zhu).


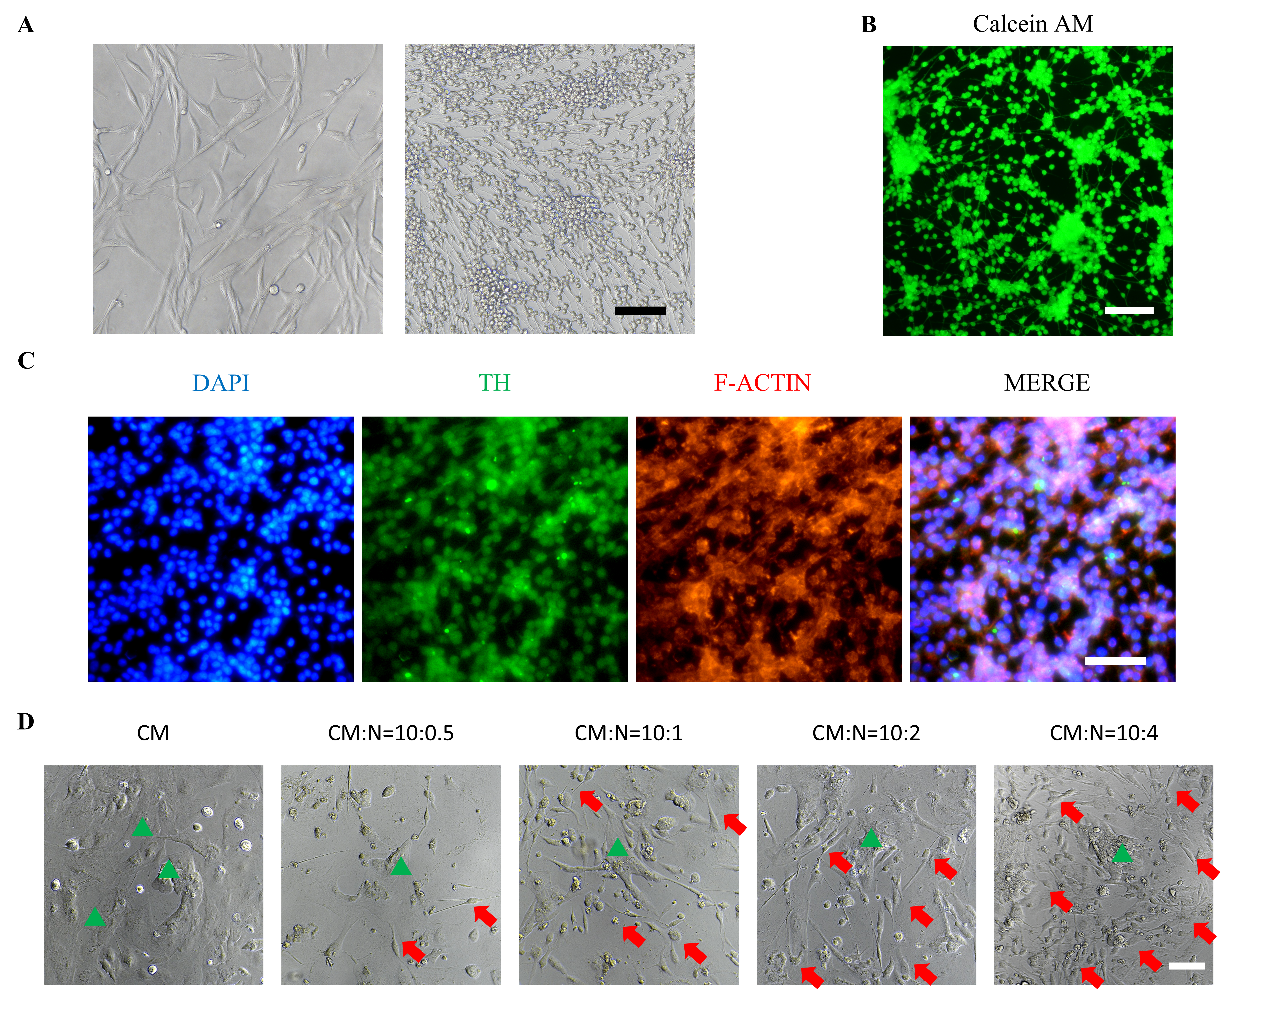


**Fig. S1** (A) Bright-field images of PC12 cells before and after differentiation. Scale bars = 100 μm. (B) Fluorescence image of PC12 cells stained with Calcein AM. Scale bars = 100 μm. (C) Immunofluorescence image of PC12 cells. Scale bars = 100 μm. (D) Bright-field images of co-cultures with different ratios of cardiomyocytes to sympathetic-like neurons. Scale bars = 100 μm. CM: cardiomyocytes; N: sympathetic-like neurons.


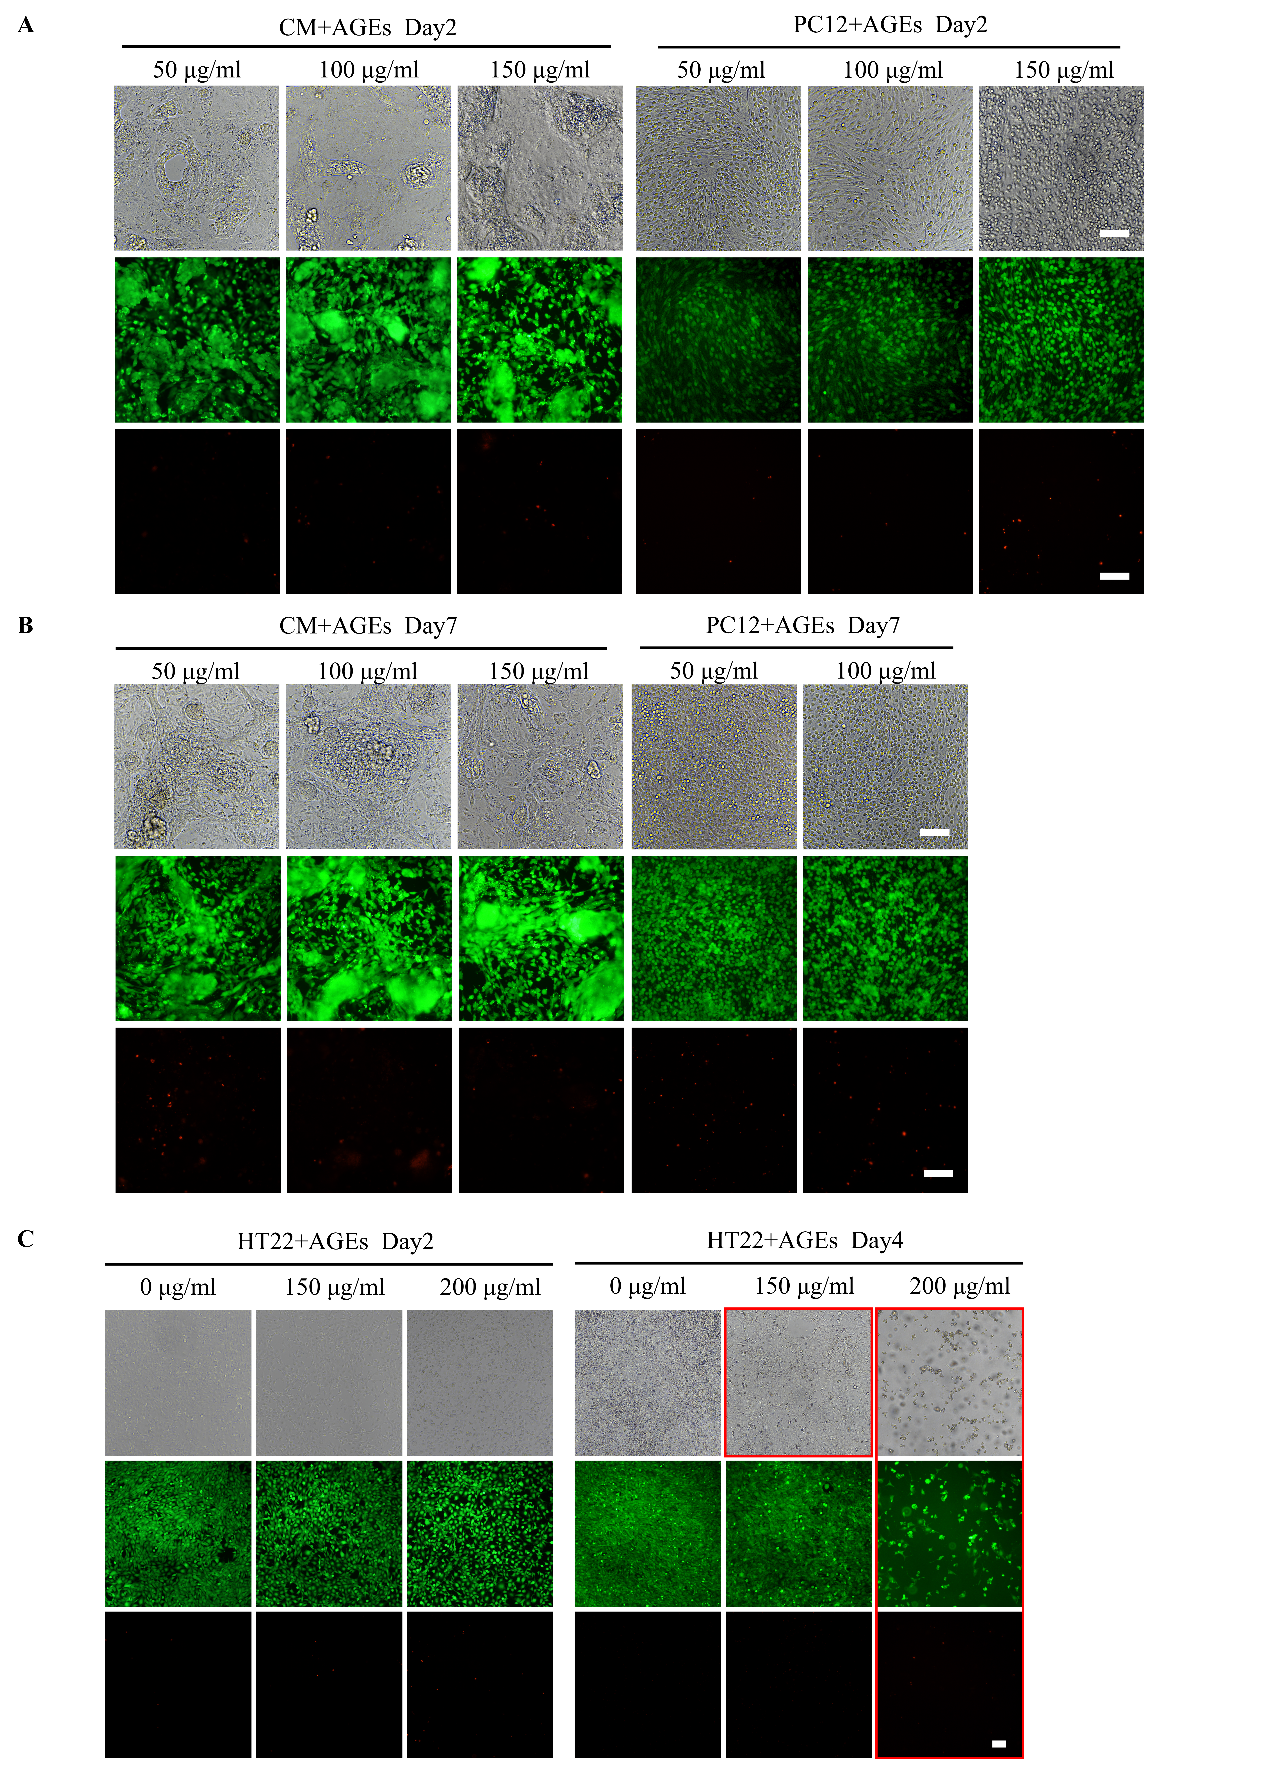


**Fig. S2** (A) Representative early-stage live/dead staining images of cardiomyocytes and PC12 cells treated with different concentrations of AGEs. Scale bars = 100 μm. (B) Representative late-stage live/dead staining images of cardiomyocytes and PC12 cells treated with different concentrations of AGEs. Scale bars = 100 μm. (C) Representative live/dead staining images of HT22 cells treated with different concentrations of AGEs. Scale bars = 100 μm.


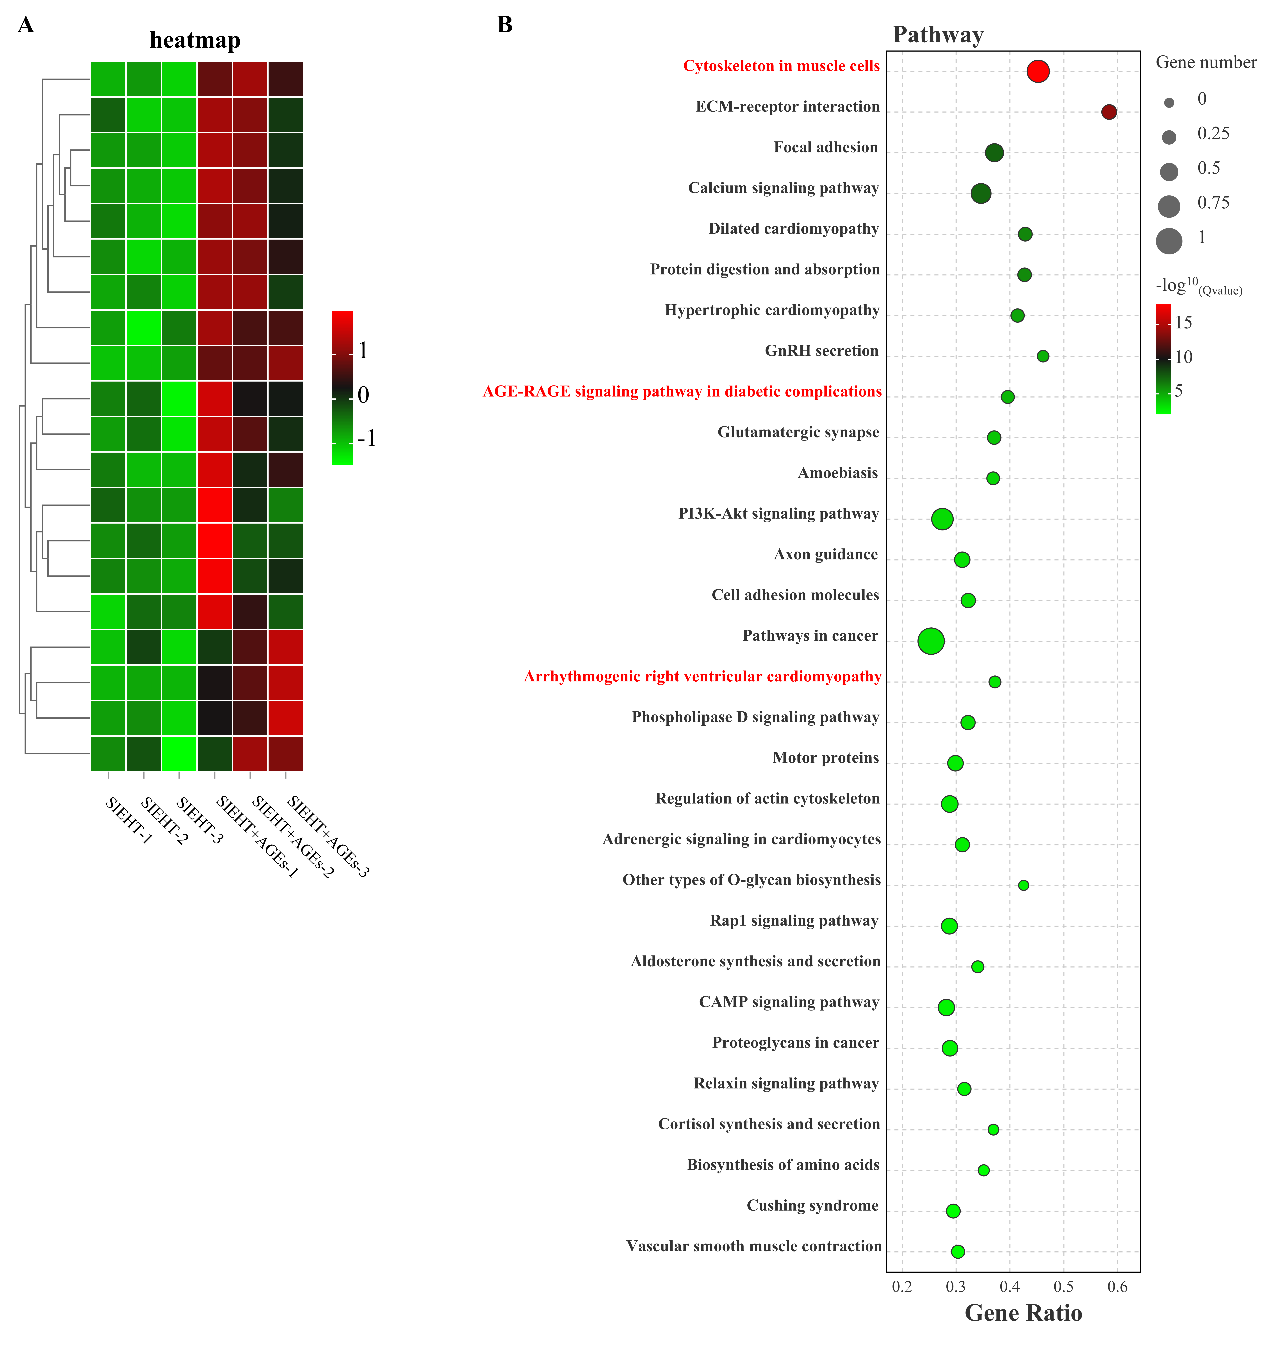


**Fig. S3** (A) Heatmap of SIEHT versus SIEHT+AGEs. (B) KEGG enrichment analysis of SIEHT versus SIEHT+AGEs.
